# Supplementary material for: Prognostic value of HbA1c for in-hospital and short-term mortality in patients with acute coronary syndrome: a systematic review and meta-analysis
Source: Springer Nature journal article supplement (doi:10.1186/s12933-019-0970-6), 2019-12-01

a

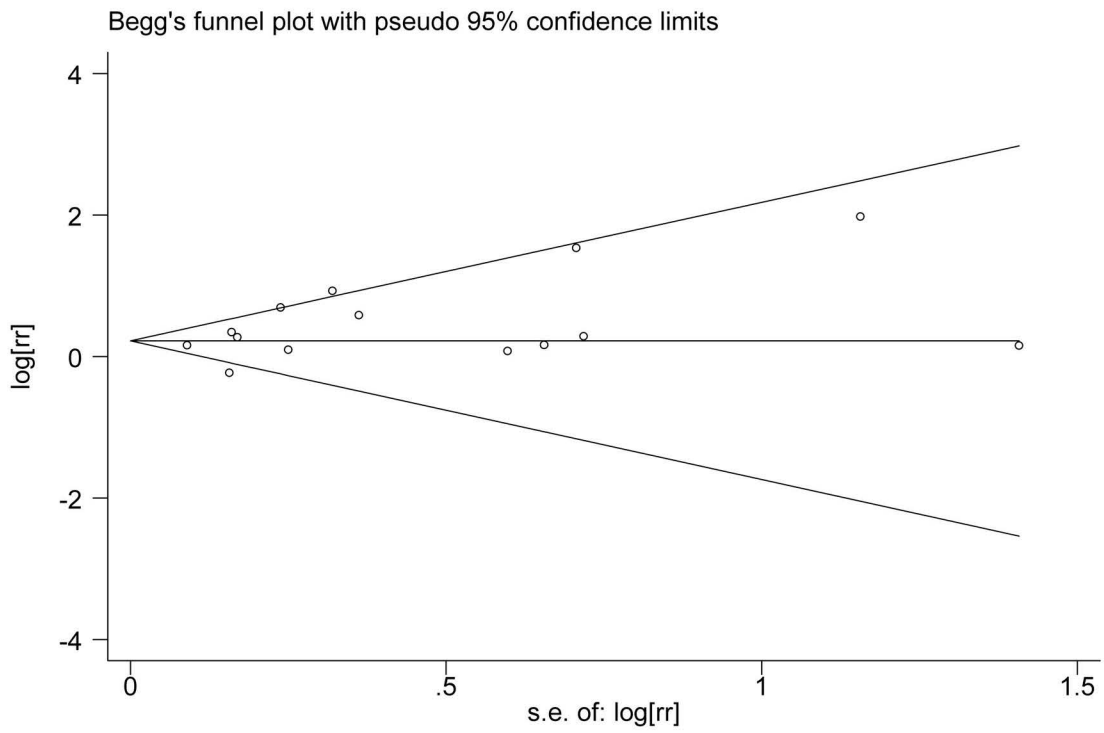

b

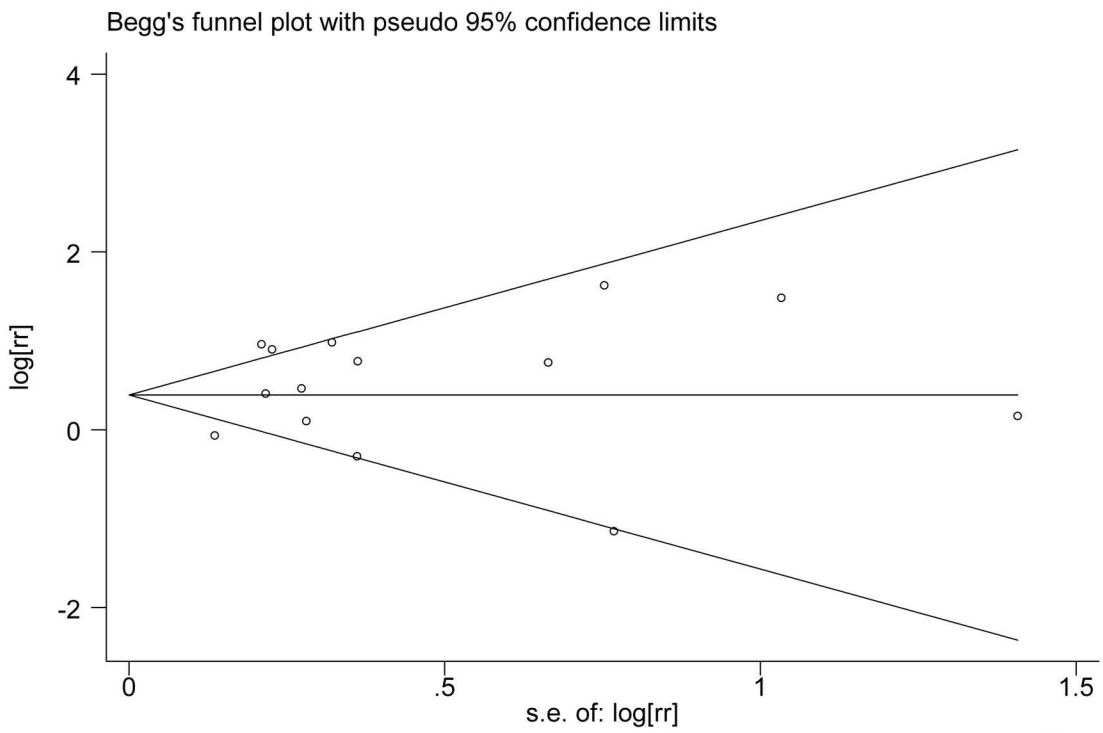

Supplement: MOESM1 [file 17496570]
